# Supplementary material for: Daily Inclusion of Resistant Starch-Containing Potatoes in a Dietary Guidelines for Americans Dietary Pattern Does Not Adversely Affect Cardiometabolic Risk or Intestinal Permeability in Adults with Metabolic Syndrome: A Randomized Controlled Trial
Source: MDPI journal article supplement (doi:10.3390/nu14081545), 2022-04-08
Supplement: s1 [file s1]

**Supplementary Table S1. Diet composition and Healthy Eating Index scores of representative 2500 kcal diets that were provided to participants who were assigned to follow a *DGA*-based diet containing bagel or potato for 2-wk.<sup>1, 2</sup>**

| <b>Dietary Component</b>                | <b>DGA + Bagel</b> | <b>DGA + Potato</b> |
|-----------------------------------------|--------------------|---------------------|
| Energy (kcal)                           | 2466               | 2460                |
| Fat (% energy)                          | 31.4               | 31.2                |
| Saturated Fat (% energy)                | 7.3                | 6.8                 |
| Cholesterol (mg)                        | 293                | 288                 |
| Carbohydrates (% energy)                | 50.7               | 51.8                |
| Protein (% energy)                      | 17.9               | 17.0                |
| Total Dietary Fiber (g)                 | 36.6               | 39.4                |
| Soluble Dietary Fiber (g)               | 10.0               | 10.1                |
| Insoluble Dietary Fiber (g)             | 26.6               | 29.2                |
| Vitamin D (µg)                          | 7.6                | 7.8                 |
| Calcium (mg)                            | 1059               | 974                 |
| Sodium (mg)                             | 2309               | 1976                |
| Potassium (mg)                          | 3572               | 4631                |
| Iron (mg)                               | 23.1               | 22.4                |
| <b>Food Groups</b>                      |                    |                     |
| Whole Fruit (servings)                  | 3.8                | 3.6                 |
| Total Vegetables (servings)             | 4.2                | 3.6                 |
| Whole Grains (servings)                 | 5.1                | 6.1                 |
| Dairy and Dairy Alternatives (servings) | 4.0                | 3.4                 |
| Total Protein Foods (servings)          | 10.8               | 10.3                |
| Refined Grains (servings)               | 5.2                | 2.9                 |
| Healthy Eating Index Score              | 98.7               | 98.3                |

<sup>1</sup> Diets were evaluated using Nutrition Data System for Research software. Reported values (means ± SE) are the 4-day average of the rotating 2500 kcal prescribed diet.

<sup>2</sup> Abbreviations: *DGA*, Dietary Guidelines for Americans.
